# Supplementary material
Source: Research Square preprint supplement (doi:10.21203/rs.3.rs-10271681/v1)

**Supplementary Table S1**

Bootstrap Stability Selection Frequencies for Student Stress Predictors.

| Predictor | Selection_Frequency | Stability_Category |
| --- | --- | --- |
| sleep_hours | 1 | Stable |
| study_hours | 1 | Stable |
| social_media_hours | 1 | Stable |
| attendance | 1 | Stable |
| exam_pressure | 1 | Stable |
| family_support | 1 | Stable |
| month7 | 1 | Stable |
| month8 | 1 | Stable |
| month9 | 1 | Stable |
| month10 | 1 | Stable |
| month11 | 1 | Stable |
| month6 | 0.982 | Stable |
| month3 | 0.962 | Stable |
| month4 | 0.94 | Stable |
| month2 | 0.904 | Stable |
| month5 | 0.896 | Stable |
| month12 | 0.838 | Stable |
| student_typecollege | 0.824 | Stable |
| student_typeworking_student | 0.71 | Moderate |
| student_typeschool | 0.654 | Moderate |

**Supplementary Table S2**

Random Forest SHAP Importance Values.

| Feature | Mean_Absolute_SHAP |
| --- | --- |
| exam_pressure | 0.179425651 |
| study_hours | 0.060311283 |
| sleep_hours | 0.033061522 |
| family_support | 0.031347736 |
| social_media_hours | 0.02540813 |
| month | 0.018957553 |
| attendance | 0.013183472 |
| student_type | 0.012225478 |

**Supplementary Table S3.**

Missing Data Summary.

| variable | missing_count | missing_percent |
| --- | --- | --- |
| student_type | 0 | 0 |
| sleep_hours | 1333 | 5.23 |
| study_hours | 1277 | 5.01 |
| social_media_hours | 1312 | 5.15 |
| attendance | 1305 | 5.12 |
| exam_pressure | 1270 | 4.98 |
| family_support | 1291 | 5.06 |
| month | 1314 | 5.15 |
| stress_level | 0 | 0 |

**Supplementary Figure S1.**

Correlation Heatmap of Continuous Predictors.


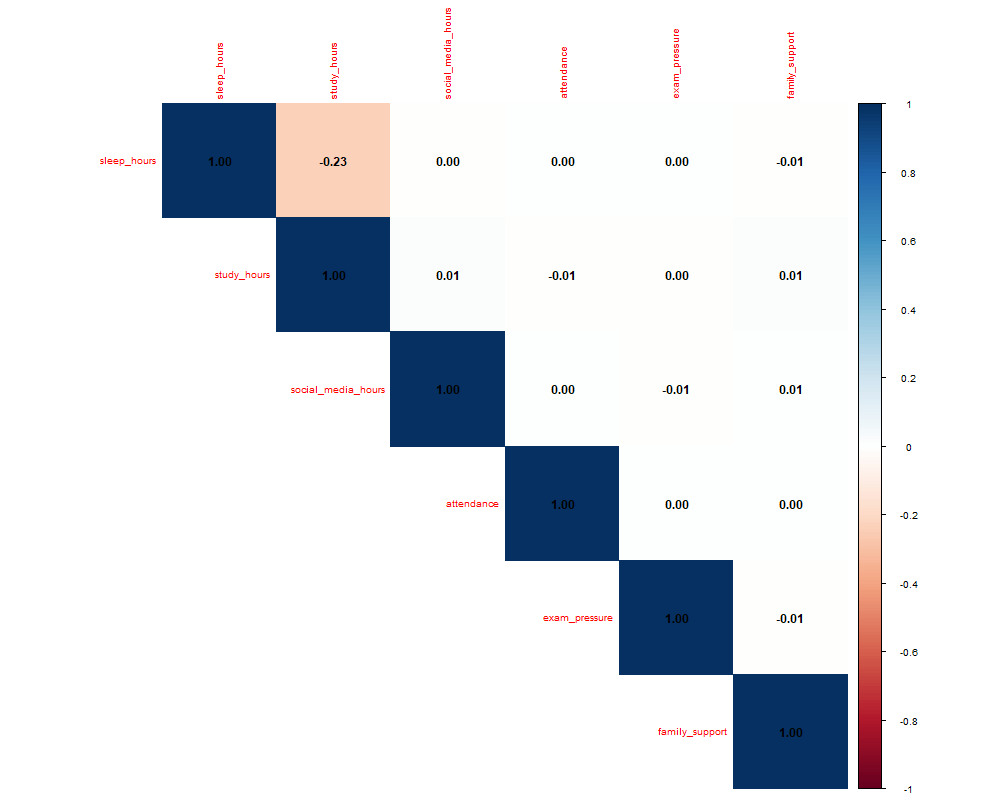

Supplement: Supplementary file 1 [file 87e45c90c2beb4fcde1453b2.docx]
